# Supplementary material for: Effectiveness of the natural resistance management refuge for Bt-cotton is dominated by local abundance of soybean and maize
Source: PubMed Central journal article supplement (PMC8413434; doi:10.1038/s41598-021-97123-8), 2021-09-02
Supplement: 41598_2021_97123_MOESM1_ESM.pdf [file 41598_2021_97123_MOESM1_ESM.pdf]

## **Supplementary Information for**

**Effectiveness of the natural resistance management refuge for *Bt*-cotton is dominated by local abundance of soybean and maize**

**Benjamin Arends, Dominic D. Reisig, Shawnee Gundry, Anders S. Huseeth, Francis P. F.**

**Reay-Jones, Jeremy K. Greene, George G. Kennedy**

Paste corresponding author name: **George G. Kennedy<sup>1</sup>**

Email: [gkennedy@ncsu.edu](mailto:gkennedy@ncsu.edu)

**This PDF file includes:**

Table S1

Table S2

Table S3

Table S4

**Supplementary Table S1. Generalized Linear Mixed Model estimates of effects of proportional areas of maize, cotton, soybean, and their respective interactions within a 1-km radius of collection site on probability of survival of *H. zea* larvae following exposure to 29  $\mu\text{g}/\text{cm}^2$  Cry1Ac in diet-overlay bioassay.<sup>1</sup>**

| Effect         | Estimate | SE     | DF | T value | P>[t]   |
|----------------|----------|--------|----|---------|---------|
| Intercept      | -0.3012  | 0.3798 | 1  | -0.79   | 0.5732  |
| Maize          | 2.8560   | 0.4304 | 51 | 6.64    | <.0001  |
| Cotton         | 4.5465   | 1.1624 | 51 | 3.91    | 0.0003  |
| Soybean        | -0.4309  | 0.3647 | 51 | -1.18   | 0.2429  |
| Maize* Cotton  | -76.3099 | 8.6708 | 51 | -8.80   | <0.0001 |
| Maize*Soybean  | -11.1448 | 1.7265 | 51 | -6.46   | <0.0001 |
| Cotton*Soybean | 7.8423   | 4.6346 | 51 | 1.69    | 0.0967  |

<sup>1</sup>Year included as a random effect in the analysis.

**Supplementary Table S2. Site, year, areas and proportional areas of cotton, maize, and soybean within a 1-km radius of each *Helicoverpa zea* larval collection site; numbers of larvae and numbers of surviving larvae in the control and corresponding Cry1Ac treatments for each bioassay, and Abbott's corrected larval survival in each bioassay.<sup>35</sup>**

| Year | hectares cotton | proportional area cotton | hectares corn | proportional area corn | hectares soybean | proportional area soybean | control number larvae | control number survivors | bioassay number larvae | bioassay number survivors | bioassay Abbotts corrected survival |
|------|-----------------|--------------------------|---------------|------------------------|------------------|---------------------------|-----------------------|--------------------------|------------------------|---------------------------|-------------------------------------|
| 2017 | 0               | 0                        | 19.9001       | 0.0633                 | 16.3883          | 0.0522                    | 16                    | 0                        | 112                    | 28                        | 28                                  |
| 2017 | 0               | 0                        | 85.9038       | 0.2734                 | 13.4168          | 0.0427                    | 16                    | 1                        | 112                    | 64                        | 68                                  |
| 2017 | 0               | 0                        | 94.7282       | 0.3015                 | 3.4217           | 0.0109                    | 16                    | 1                        | 112                    | 21                        | 22                                  |
| 2018 | 0               | 0                        | 93.3776       | 0.2972                 | 0.4502           | 0.0014                    | 16                    | 1                        | 112                    | 101                       | 108                                 |
| 2017 | 0               | 0                        | 94.9984       | 0.3024                 | 169.5564         | 0.5397                    | 16                    | 3                        | 112                    | 7                         | 9                                   |
| 2017 | 0               | 0                        | 20.9807       | 0.0668                 | 28.9047          | 0.0920                    | 16                    | 1                        | 112                    | 52                        | 55                                  |
| 2017 | 0               | 0                        | 8.1041        | 0.0258                 | 11.7960          | 0.0375                    | 16                    | 3                        | 112                    | 1                         | 1                                   |
| 2017 | 0               | 0                        | 11.1657       | 0.0355                 | 6.4833           | 0.0206                    | 16                    | 0                        | 64                     | 7                         | 7                                   |
| 2018 | 0               | 0                        | 12.2462       | 0.0390                 | 8.5544           | 0.0272                    | 16                    | 0                        | 112                    | 100                       | 100                                 |
| 2018 | 0               | 0                        | 10.4453       | 0.0332                 | 18.2793          | 0.0582                    | 16                    | 2                        | 112                    | 54                        | 62                                  |
| 2018 | 0               | 0                        | 13.6870       | 0.0436                 | 15.7580          | 0.0502                    | 16                    | 0                        | 112                    | 58                        | 58                                  |
| 2017 | 0               | 0                        | 15.8481       | 0.0504                 | 41.8713          | 0.1333                    | 16                    | 0                        | 96                     | 55                        | 55                                  |
| 2018 | 0               | 0                        | 36.5586       | 0.1164                 | 17.5589          | 0.0559                    | 16                    | 0                        | 112                    | 75                        | 75                                  |
| 2018 | 0               | 0                        | 4.3222        | 0.0138                 | 0.0000           | 0.0000                    | 16                    | 0                        | 112                    | 99                        | 99                                  |
| 2017 | 0               | 0                        | 11.0756       | 0.0353                 | 22.8716          | 0.0728                    | 16                    | 0                        | 64                     | 7                         | 7                                   |
| 2017 | 0.0900          | 0.0003                   | 120.1212      | 0.3824                 | 182.7931         | 0.5818                    | 16                    | 0                        | 112                    | 15                        | 15                                  |
| 2017 | 0.0900          | 0.0003                   | 23.2318       | 0.0739                 | 9.4548           | 0.0301                    | 16                    | 1                        | 112                    | 74                        | 79                                  |
| 2017 | 0.0900          | 0.0003                   | 165.0541      | 0.5254                 | 68.7050          | 0.2187                    | 16                    | 1                        | 112                    | 27                        | 29                                  |
| 2017 | 0.1801          | 0.0006                   | 62.5819       | 0.1992                 | 128.9457         | 0.4104                    | 16                    | 0                        | 112                    | 16                        | 16                                  |
| 2018 | 0.1801          | 0.0006                   | 4.0521        | 0.0129                 | 28.3644          | 0.0903                    | 16                    | 4                        | 112                    | 35                        | 47                                  |
| 2017 | 0.3602          | 0.0011                   | 0.0900        | 0.0003                 | 37.5491          | 0.1195                    | 16                    | 1                        | 112                    | 22                        | 23                                  |
| 2018 | 0.3602          | 0.0011                   | 25.8432       | 0.0823                 | 43.2220          | 0.1376                    | 16                    | 1                        | 112                    | 61                        | 65                                  |
| 2017 | 0.3602          | 0.0011                   | 27.4640       | 0.0874                 | 46.0134          | 0.1465                    | 16                    | 0                        | 112                    | 29                        | 29                                  |
| 2017 | 0.4502          | 0.0014                   | 60.5108       | 0.1926                 | 87.8848          | 0.2797                    | 16                    | 0                        | 112                    | 45                        | 45                                  |
| 2017 | 0.7204          | 0.0023                   | 64.2027       | 0.2044                 | 48.2646          | 0.1536                    | 16                    | 0                        | 112                    | 30                        | 30                                  |
| 2018 | 0.7204          | 0.0023                   | 105.4437      | 0.3356                 | 43.4922          | 0.1384                    | 16                    | 1                        | 75                     | 35                        | 38                                  |
| 2018 | 0.9905          | 0.0032                   | 169.1962      | 0.5386                 | 92.7472          | 0.2952                    | 16                    | 0                        | 112                    | 44                        | 44                                  |

|      |         |        |          |        |          |        |    |   |     |    |    |
|------|---------|--------|----------|--------|----------|--------|----|---|-----|----|----|
| 2017 | 1.2606  | 0.0040 | 116.8795 | 0.3720 | 84.1028  | 0.2677 | 16 | 1 | 112 | 22 | 23 |
| 2018 | 1.4407  | 0.0046 | 8.7344   | 0.0278 | 39.8903  | 0.1270 | 16 | 2 | 71  | 21 | 25 |
| 2018 | 1.6208  | 0.0052 | 1.8009   | 0.0057 | 145.9643 | 0.4646 | 16 | 1 | 53  | 21 | 23 |
| 2018 | 2.4312  | 0.0077 | 57.4493  | 0.1829 | 64.8330  | 0.2064 | 16 | 2 | 112 | 47 | 54 |
| 2018 | 3.1516  | 0.0100 | 38.3595  | 0.1221 | 128.8556 | 0.4102 | 16 | 3 | 112 | 77 | 95 |
| 2018 | 3.6018  | 0.0115 | 33.7672  | 0.1075 | 95.8988  | 0.3053 | 16 | 0 | 82  | 45 | 45 |
| 2018 | 3.6018  | 0.0115 | 27.5540  | 0.0877 | 61.8615  | 0.1969 | 16 | 1 | 112 | 63 | 67 |
| 2018 | 4.6824  | 0.0149 | 6.2132   | 0.0198 | 144.1634 | 0.4589 | 16 | 1 | 80  | 31 | 33 |
| 2018 | 4.7724  | 0.0152 | 42.7718  | 0.1361 | 111.6569 | 0.3554 | 16 | 3 | 98  | 16 | 20 |
| 2018 | 5.1326  | 0.0163 | 55.6483  | 0.1771 | 30.5255  | 0.0972 | 16 | 0 | 112 | 47 | 47 |
| 2017 | 5.4028  | 0.0172 | 4.0521   | 0.0129 | 94.9984  | 0.3024 | 16 | 0 | 112 | 53 | 53 |
| 2018 | 5.6729  | 0.0181 | 3.7819   | 0.0120 | 21.1608  | 0.0674 | 16 | 3 | 112 | 19 | 23 |
| 2017 | 5.7629  | 0.0183 | 0.9905   | 0.0032 | 85.2734  | 0.2714 | 16 | 3 | 112 | 19 | 23 |
| 2017 | 5.9430  | 0.0189 | 86.0838  | 0.2740 | 76.9892  | 0.2451 | 16 | 2 | 112 | 47 | 54 |
| 2017 | 12.3363 | 0.0393 | 68.7050  | 0.2187 | 168.3858 | 0.5360 | 16 | 2 | 112 | 4  | 5  |
| 2017 | 14.3173 | 0.0456 | 30.9758  | 0.0986 | 47.3641  | 0.1508 | 16 | 1 | 80  | 20 | 21 |
| 2018 | 17.7390 | 0.0565 | 61.5914  | 0.1961 | 36.2885  | 0.1155 | 16 | 0 | 112 | 76 | 76 |
| 2018 | 19.4499 | 0.0619 | 32.1464  | 0.1023 | 91.5766  | 0.2915 | 16 | 1 | 112 | 79 | 84 |
| 2017 | 23.0517 | 0.0734 | 49.3451  | 0.1571 | 70.5059  | 0.2244 | 16 | 1 | 112 | 21 | 22 |
| 2017 | 27.0138 | 0.0860 | 17.6490  | 0.0562 | 74.6480  | 0.2376 | 16 | 8 | 75  | 13 | 26 |
| 2017 | 29.0848 | 0.0926 | 39.3500  | 0.1253 | 35.7482  | 0.1138 | 16 | 1 | 112 | 29 | 31 |
| 2018 | 32.7767 | 0.1043 | 17.0187  | 0.0542 | 67.9846  | 0.2164 | 16 | 0 | 112 | 63 | 63 |
| 2018 | 34.0373 | 0.1083 | 60.2407  | 0.1918 | 136.6896 | 0.4351 | 16 | 0 | 78  | 18 | 18 |
| 2018 | 36.4686 | 0.1161 | 40.3405  | 0.1284 | 45.8333  | 0.1459 | 16 | 1 | 112 | 27 | 29 |
| 2017 | 37.0088 | 0.1178 | 46.5537  | 0.1482 | 65.3733  | 0.2081 | 16 | 0 | 112 | 28 | 28 |
| 2018 | 37.7292 | 0.1201 | 2.3412   | 0.0075 | 1.1706   | 0.0037 | 16 | 0 | 112 | 76 | 76 |
| 2018 | 37.8193 | 0.1204 | 5.6729   | 0.0181 | 70.0557  | 0.2230 | 16 | 1 | 112 | 53 | 57 |
| 2018 | 41.0609 | 0.1307 | 32.1464  | 0.1023 | 14.6775  | 0.0467 | 16 | 0 | 112 | 47 | 47 |
| 2017 | 44.5727 | 0.1419 | 19.8101  | 0.0631 | 134.8887 | 0.4294 | 16 | 0 | 112 | 28 | 28 |
| 2018 | 45.0229 | 0.1433 | 51.9565  | 0.1654 | 49.2551  | 0.1568 | 16 | 1 | 106 | 20 | 21 |
| 2018 | 72.6670 | 0.2313 | 18.2793  | 0.0582 | 50.4257  | 0.1605 | 16 | 8 | 112 | 45 | 90 |
| 2018 | 102.022 | 0.3247 | 27.3739  | 0.0871 | 65.4633  | 0.2084 | 16 | 1 | 62  | 38 | 41 |

<sup>35</sup> W.S. Abbott, A Method of Computing the Effectiveness of an Insecticide. *J. Am. Mosq.* 3(2), 302–303 (1925).

**Supplementary Table S3. Mean and standard deviation of proportional abundance of cotton, maize, and soybean within a 1-Km radius of each *H. zea* collect site from 2014 through 2018. \*Year indicates year larvae were collected for bioassay. \*\*Larvae were collected for bioassay in both 2017 & 2018.**

| Year* | State          | Site | Cotton        | Maize         | Soybean       |
|-------|----------------|------|---------------|---------------|---------------|
| 2017  | North Carolina | 2    | 0.034 (0.033) | 0.185 (0.057) | 0.236 (0.04)  |
|       |                | 3    | 0.171 (0.049) | 0.079 (0.049) | 0.191 (0.036) |
|       |                | 4    | 0 (0.001)     | 0.022 (0.011) | 0.045 (0.007) |
|       |                | 5**  | 0 (0)         | 0.032 (0.014) | 0.027 (0.009) |
|       |                | 6    | 0.004 (0.008) | 0.053 (0.025) | 0.12 (0.034)  |
|       |                | 8    | 0 (0)         | 0.082 (0.028) | 0.025 (0.029) |
|       |                | 9    | 0.002 (0.002) | 0.105 (0.041) | 0.117 (0.035) |
|       |                | 11   | 0.053 (0.036) | 0.084 (0.078) | 0.274 (0.118) |
|       |                | 14   | 0.001 (0.001) | 0.199 (0.088) | 0.335 (0.094) |
|       |                | 15   | 0.005 (0.009) | 0.469 (0.086) | 0.481 (0.089) |
|       |                | 18   | 0.118 (0.016) | 0.074 (0.041) | 0.138 (0.037) |
|       |                | 20   | 0.025 (0.028) | 0.134 (0.071) | 0.222 (0.045) |
|       |                | 21   | 0.036 (0.01)  | 0.057 (0.046) | 0.169 (0.013) |
|       |                | 22   | 0 (0)         | 0.055 (0.019) | 0.06 (0.013)  |
|       |                | 23   | 0 (0)         | 0.219 (0.045) | 0.076 (0.02)  |
|       |                | 25   | 0 (0)         | 0.297 (0.012) | 0.011 (0.006) |
|       |                | 26   | 0.001 (0.001) | 0.4 (0.119)   | 0.462 (0.104) |
|       |                | 28   | 0.001 (0.001) | 0.342 (0.171) | 0.553 (0.169) |
|       |                | 29   | 0.045 (0.051) | 0.023 (0.032) | 0.085 (0.046) |
|       |                | 30   | 0.004 (0.002) | 0.283 (0.111) | 0.399 (0.126) |
|       |                | 31   | 0.096 (0.056) | 0.182 (0.168) | 0.55 (0.158)  |
|       |                | 34   | 0 (0)         | 0.082 (0.036) | 0.111 (0.039) |
|       |                | 35   | 0 (0)         | 0.056 (0.017) | 0.072 (0.031) |
|       |                | 36   | 0.102 (0.076) | 0.21 (0.101)  | 0.279 (0.099) |
|       |                | 37   | 0.093 (0.093) | 0.047 (0.052) | 0.158 (0.075) |
|       |                | 38   | 0.119 (0.053) | 0.032 (0.022) | 0.225 (0.064) |
|       |                | 40   | 0.078 (0.053) | 0.309 (0.236) | 0.567 (0.214) |
|       |                | 41   | 0.07 (0.072)  | 0.462 (0.056) | 0.433 (0.075) |
| 2018  | North Carolina | 17   | 0.008 (0.008) | 0.034 (0.028) | 0.113 (0.019) |
|       |                | 25   | 0 (0)         | 0.284 (0.011) | 0.011 (0.006) |
|       |                | 30   | 0.004 (0.004) | 0.248 (0.095) | 0.386 (0.104) |
|       |                | 44   | 0.042 (0.068) | 0.155 (0.145) | 0.266 (0.179) |
|       |                | 45   | 0.044 (0.037) | 0.081 (0.101) | 0.435 (0.127) |
|       |                | 47   | 0.006 (0.005) | 0.222 (0.089) | 0.269 (0.096) |
|       |                | 49   | 0.005 (0.009) | 0.312 (0.051) | 0.319 (0.06)  |
|       |                | 51   | 0.009 (0.008) | 0.162 (0.036) | 0.328 (0.042) |

|  |                |    |               |               |               |
|--|----------------|----|---------------|---------------|---------------|
|  |                | 52 | 0.124 (0.045) | 0.143 (0.03)  | 0.347 (0.072) |
|  |                | 53 | 0.121 (0.047) | 0.049 (0.041) | 0.318 (0.054) |
|  |                | 55 | 0.123 (0.06)  | 0.207 (0.038) | 0.4 (0.055)   |
|  |                | 56 | 0 (0)         | 0.099 (0.055) | 0.116 (0.048) |
|  |                | 57 | 0.002 (0.003) | 0.098 (0.035) | 0.113 (0.036) |
|  |                | 58 | 0 (0)         | 0.051 (0.013) | 0.115 (0.014) |
|  |                | 59 | 0.029 (0.025) | 0.199 (0.125) | 0.199 (0.118) |
|  |                | 60 | 0.11 (0.015)  | 0.057 (0.012) | 0.209 (0.025) |
|  |                | 62 | 0.001 (0)     | 0.016 (0.017) | 0.107 (0.019) |
|  |                | 63 | 0.082 (0.049) | 0.083 (0.03)  | 0.063 (0.013) |
|  |                | 64 | 0 (0)         | 0.209 (0.081) | 0.254 (0.067) |
|  |                | 65 | 0.04 (0.025)  | 0.163 (0.052) | 0.196 (0.083) |
|  |                | 67 | 0.099 (0.14)  | 0.094 (0.089) | 0.357 (0.202) |
|  |                | 71 | 0 (0)         | 0.017 (0.003) | 0.002 (0.002) |
|  |                | 72 | 0.004 (0.005) | 0.507 (0.169) | 0.319 (0.164) |
|  |                | 11 | 0.066 (0.041) | 0.026 (0.024) | 0.005 (0.002) |
|  | South Carolina | 13 | 0.035 (0.022) | 0.156 (0.092) | 0.13 (0.1)    |
|  |                | 15 | 0.016 (0.011) | 0.087 (0.021) | 0.218 (0.031) |
|  |                | 16 | 0.027 (0.014) | 0.148 (0.053) | 0.225 (0.026) |
|  |                | 17 | 0.153 (0.028) | 0.095 (0.026) | 0.11 (0.041)  |
|  |                | 18 | 0.029 (0.019) | 0.025 (0.018) | 0.067 (0.019) |
|  |                | 23 | 0.24 (0.025)  | 0.103 (0.067) | 0.128 (0.062) |
|  |                |    |               |               |               |

**Supplementary Table S4. Regression of relationships between proportional areas of cotton and soybean, cotton and maize, and soybean and maize within a 1-km radius of *H. zea* larval collection site.**

| Dependent variable | Independent variable | Slope  | F (df)      | P     | R <sup>2</sup> |
|--------------------|----------------------|--------|-------------|-------|----------------|
| Cotton             | Soybean              | NS     | 0,20 (1,57) | 0.656 | 0.0035         |
| Cotton             | Maize                | NS     | 1.59 (1,57) | 0.213 | 0.0271         |
| Soybean            | Maize                | 0.3224 | 4.42 (1,57) | 0.040 | 0.0719         |
